# Supplementary material for: Cu–N4 in copper phthalocyanine@CFC catalyst for ammonia oxidation reaction catalysis
Source: Royal Society of Chemistry journal article supplement (doi:10.1039/d2cp05589a), 2023-01-01
Supplement: d2cp05589a1.pdf [file d2cp05589a1.pdf]

## Supporting Information

### **Cu-N<sub>4</sub> in Copper phthalocyanine@CFC catalyst for ammonia oxidation reaction catalysis**

Ziyi Liu<sup>1</sup>, Mengxue Wu<sup>1</sup>, Jinfu Ma<sup>\*1,2</sup>

*<sup>1</sup>School of Materials Science and Engineering, North Minzu University,  
Yinchuan 750021, China*

*<sup>2</sup>Research Center of Silicon Target and Silicon-Carbon Negative Material  
Engineering Technology, School of Materials Science and Engineering, North Minzu  
University, Yinchuan 750021, China*

---

\*Corresponding author: Prof. Jinfu Ma, E-mail: ma\_jinfu@nun.edu.cn (J. Ma).

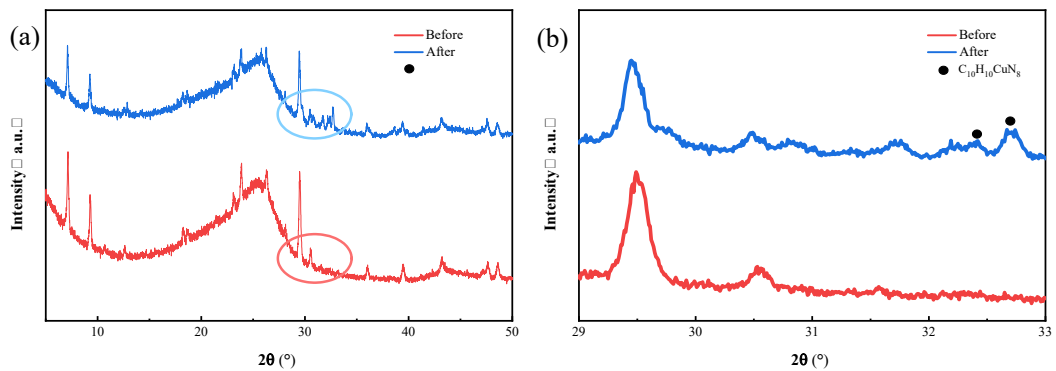

Fig.S1 XRD images of (a-b) before and after electrochemical comparison of CuPc-2.

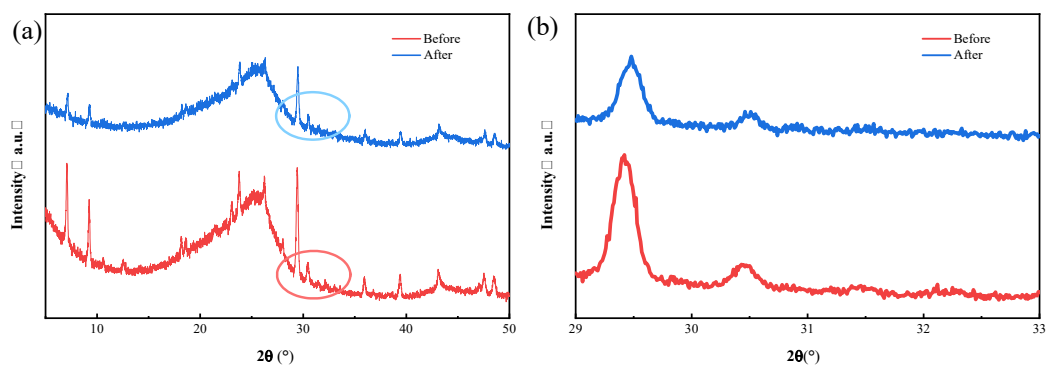

Fig.S2 XRD images of (a-b) before and after electrochemical comparison of CuPc-3.

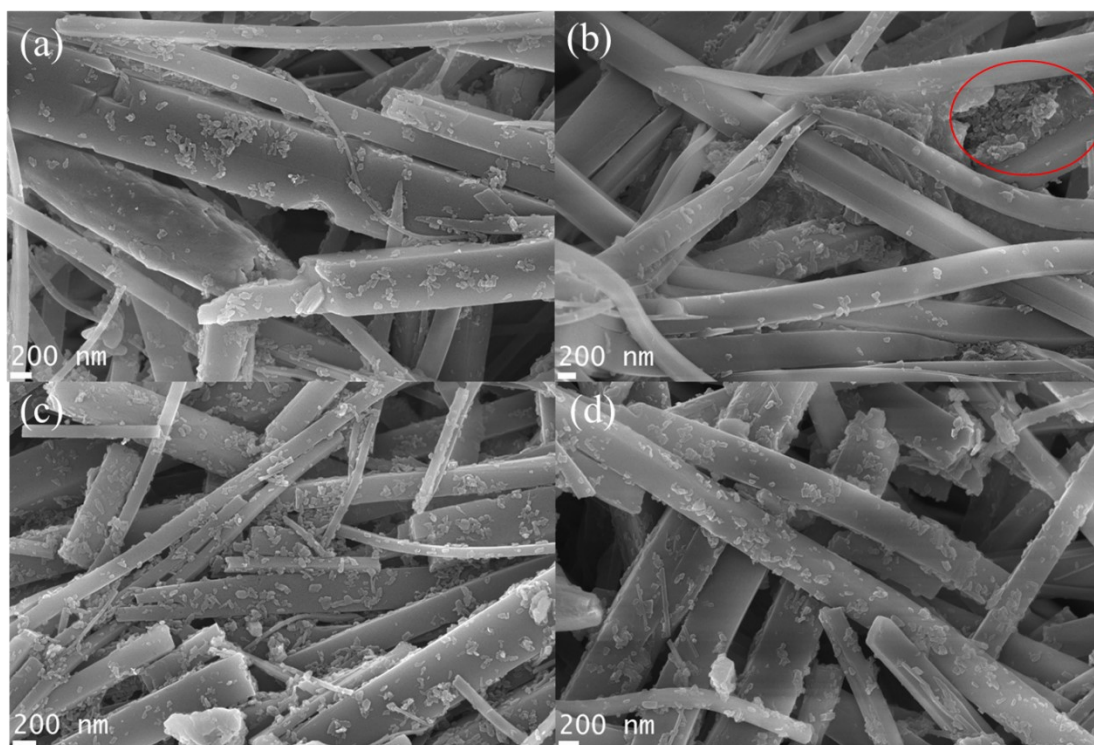

Fig.S3 (a) SEM image before CuPc-2 electrochemical test; (b) SEM image after CuPc-2 electrochemical test; (c) SEM image before CuPc-3 electrochemical test; (d) SEM image after CuPc-3 electrochemical test

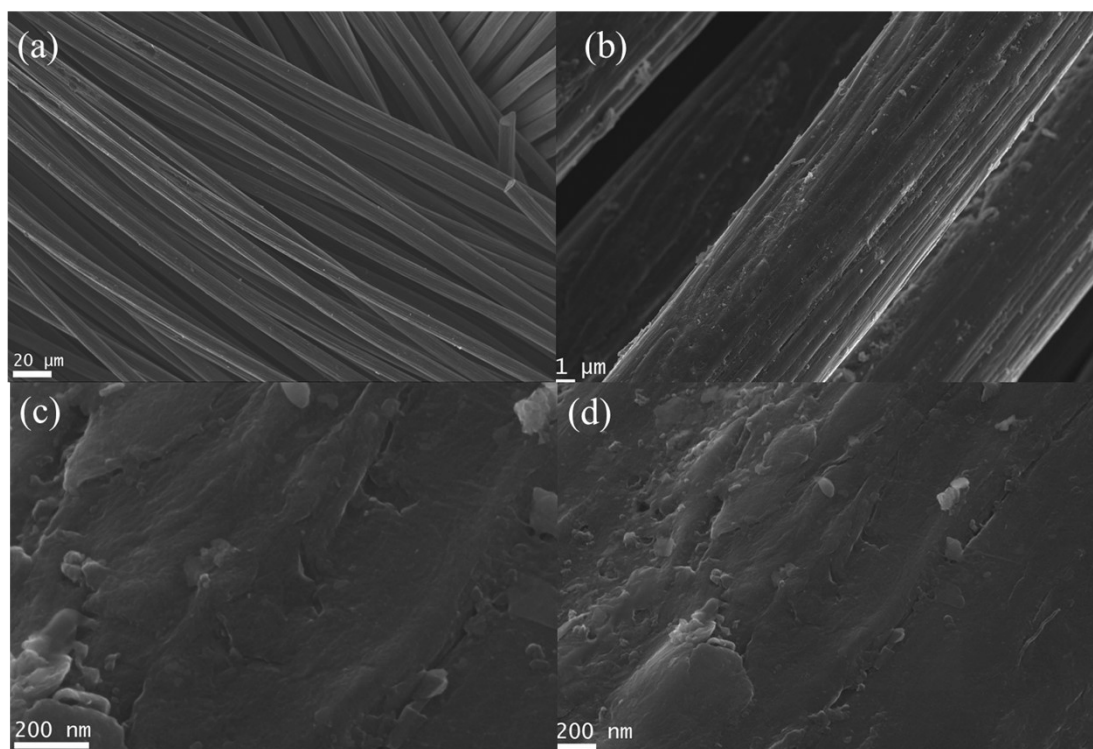

Fig.S4 SEM images of Background

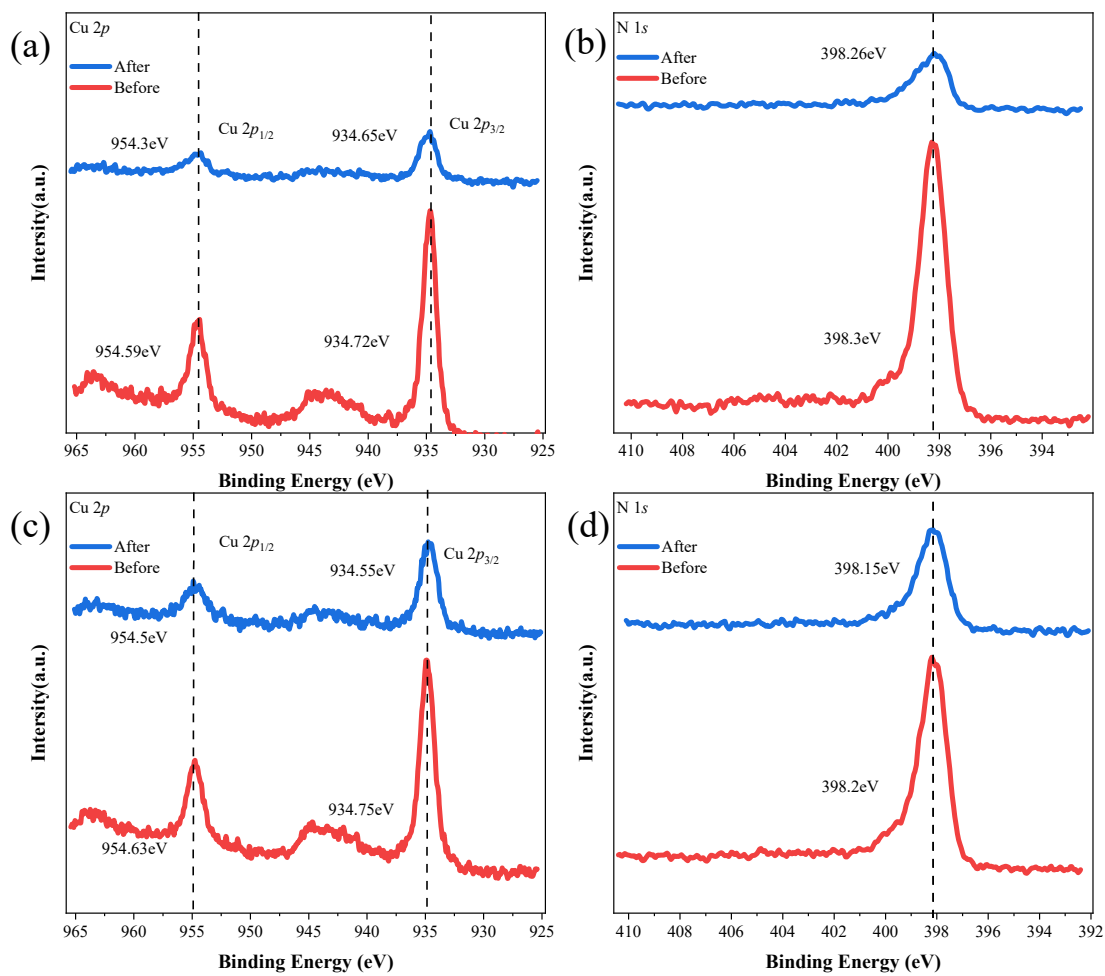

Fig.S5 (a-b) before and after electrochemical comparison of CuPc-2;(c-d) before and after electrochemical comparison of CuPc-3.

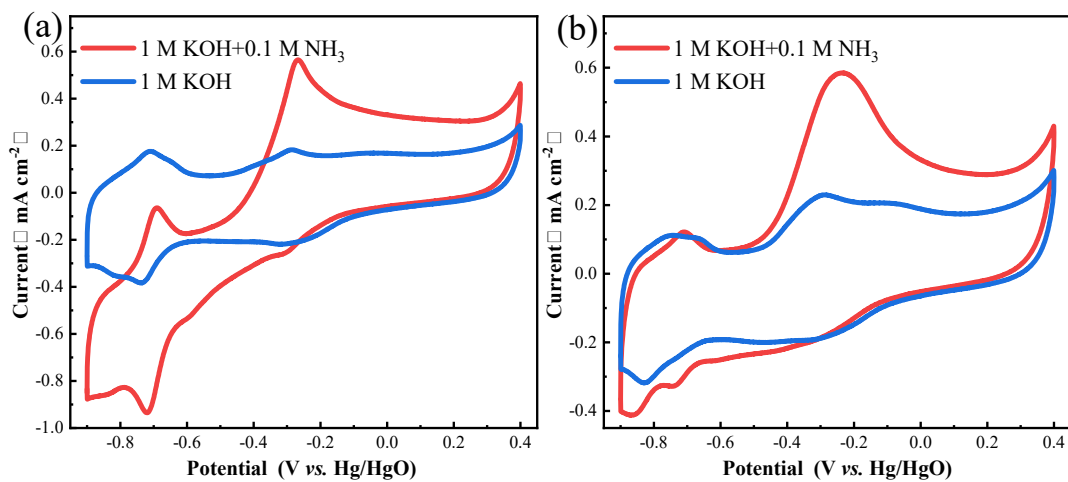

Fig.S6 (a) CV of CuPc-2 under different electrolytes; (b) cv of CuPc-3 under different electrolytes;

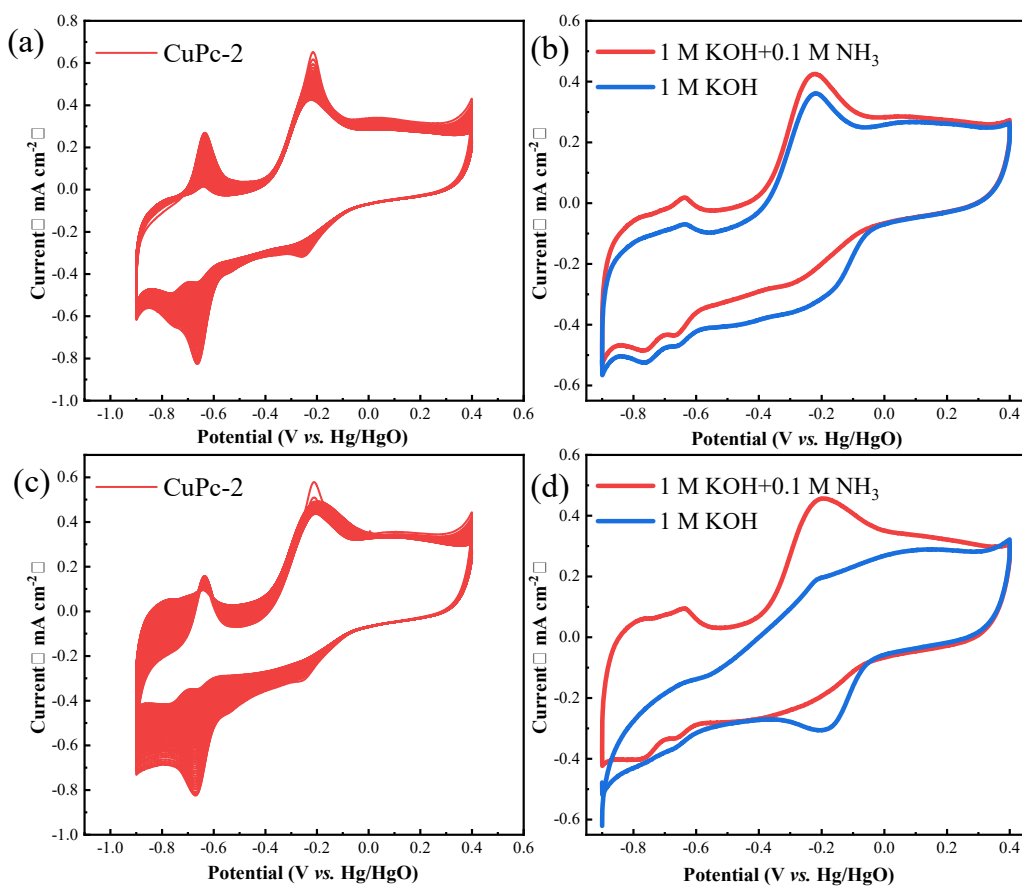

Fig.S7 (a) Stability test of CuPc-2 at 1 M KOH+ 0.1 M NH<sub>3</sub>; (b) CV of CuPc-2 under different electrolytes after 100 cycles; (c) Stability test of CuPc-3 at 1 M KOH+ 0.1 M NH<sub>3</sub>; (d) CV of CuPc-3 under different electrolytes after 100 cycles.

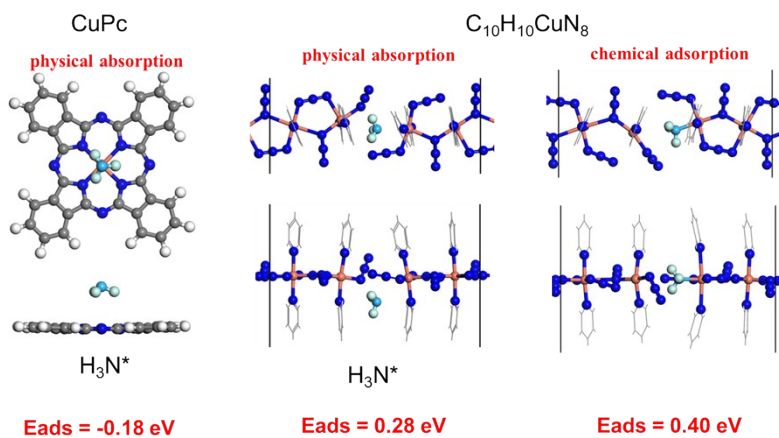

Fig.S8 H<sub>3</sub>N\* adsorption energy diagram of CuPc and C<sub>10</sub>H<sub>10</sub>CuN<sub>8</sub>.

---

**Table.S1** UPS result of CuPC-X(X=1,2,3)

---

| Catalyst | Work function(eV) | Fermi Level(eV) | Cut-off energy(eV) |
|----------|-------------------|-----------------|--------------------|
| CuPc-1   | 4.17              | 0.65            | 17.7               |
| CuPc-2   | 4.9               | 0.55            | 16.87              |
| CuPc-3   | 4.68              | 0.49            | 17.03              |

---



---

**Table. S2** Summary of some Pt-based catalysts.

---

| Catalysts | Electrolyte<br>(mol/L KOH+ mol/L NH <sub>3</sub> -H <sub>2</sub> O) | Peak current density<br>(mA/cm <sup>2</sup> ) | Peak potential (vs.<br>RHE)/V | Docum<br>ents |
|-----------|---------------------------------------------------------------------|-----------------------------------------------|-------------------------------|---------------|
| Pt        | 1+0.1                                                               | 1.7                                           | 0.68                          | 1             |
| Pt/C      | 1+0.1                                                               | 20                                            | 0.68                          | 1             |
| Pt/CNT    | 1+0.1                                                               | 58                                            | 0.78                          | 1             |
| Pt-Zn     | 0.5+0.1                                                             | 0.6                                           | 0.7                           | 2             |
| Pt-Ir     | 1+0.1                                                               | 0.4                                           | 0.63                          | 3             |

---

1. N. Hanada, Y. Kohase, K. Hori, H. Sugime and S. Noda, *Electrochimica Acta*, 2020, **341**, 136027.
2. J. Jiang, *Electrochemistry Communications*, 2017, **75**, 52-55.
3. S. Le Vot, L. Roué and D. Bélanger, *Journal of Power Sources*, 2013, **223**, 221-231.
